# Supplementary material
Source: MDPI journal article supplement (https://www.mdpi.com/2073-4441/12/10/2926)
Supplement: s1 [file s1]

**Table S.1** Crop types, distribution, and water requirements in the study area.

| <b>Crop type</b> | <b>%<br/>invested<br/>area*</b> | <b>Average yearly crop<br/>requirement<br/>[m<sup>3</sup>/ha]*</b> |
|------------------|---------------------------------|--------------------------------------------------------------------|
| Tobacco          | 6.2%                            | 2,655                                                              |
| Sunflower        |                                 |                                                                    |
| Melon            | 15.3%                           | 3,988                                                              |
| Tomato           |                                 |                                                                    |
| Eggplant         |                                 |                                                                    |
| Pepper           |                                 |                                                                    |
| Fennel           | 29.0%                           | 2,495                                                              |
| Cauliflower      |                                 |                                                                    |
| Lettuce          |                                 |                                                                    |
| Potato           |                                 |                                                                    |
| Grape            | 14.0%                           | 2,741                                                              |
| Orchard          | 3.5%                            | 3,140                                                              |
| Olive            | 32.0%                           | 837                                                                |
| Total/average    | 100.0%                          | 2,260                                                              |

**Table S.2** Relevant information to assess demand for beach services in Gallipoli and the related benefits

|     |                                                                                        |                                                                                                                  | Notes/Source                                                                                                                                     |
|-----|----------------------------------------------------------------------------------------|------------------------------------------------------------------------------------------------------------------|--------------------------------------------------------------------------------------------------------------------------------------------------|
| [a] | Number of existing concessions in Gallipoli                                            | 30                                                                                                               | Source: Regional Coastal Plan (2007)                                                                                                             |
| [b] | Conceded area in Gallipoli [m <sup>2</sup> ]                                           | 51,080                                                                                                           | Source: Regional Coastal Plan (2007)                                                                                                             |
| [c] | Average concession area in Gallipoli [m <sup>2</sup> ]                                 | 1,702.7                                                                                                          | $[c] = [b]/[a]$                                                                                                                                  |
| [d] | Estimated area of the new concession site [m <sup>2</sup> ]                            | 15,000                                                                                                           | 500 long x 30 m rectangular area                                                                                                                 |
| [e] | Estimated number of new concessions net of 10 m space between two adjacent concessions | 8                                                                                                                | $[d] - 10 * ([e] - 1) * 30 = [c] * [e] \rightarrow [e] = 14,700 / ([c] + 300)$                                                                   |
| [f] | Types of existing concessions in Gallipoli:                                            | 60% with bar and restaurant (cluster 3), 20% with bar only (cluster 1), 20% with beach services only (cluster 6) | Processing of information from <a href="http://www.pagine12.it/gallipoli/5576533997518848">http://www.pagine12.it/gallipoli/5576533997518848</a> |
| [g] | Average area of cluster 1 concessions                                                  | 1,680 m <sup>2</sup> (of which 113.6 m <sup>2</sup> sheltered)                                                   | processed from [33] and reconciled with average Gallipoli concession size                                                                        |
| [h] | Average area of cluster 3 concessions                                                  | 2,001 m <sup>2</sup> (of which 241.4 m <sup>2</sup> sheltered)                                                   | processed from [33] and reconciled with average Gallipoli concession size                                                                        |
| [i] | Average area of cluster 6 concessions                                                  | 968 m <sup>2</sup> (of which 150 m <sup>2</sup> sheltered)                                                       | processed from [32] and reconciled with average Gallipoli concession size                                                                        |
